# Supplementary material for: Highly optically-diluted lanthanide coordination polymers with unexpected strong luminescence
Source: Royal Society of Chemistry journal article supplement (doi:10.1039/d5qi02306h), 2025-12-30
Supplement: d5qi02306h1.pdf [file d5qi02306h1.pdf]

## SUPPORTING INFORMATION

Highly optically diluted lanthanide coordination polymers with unexpected strong luminescence.

Chloé Blais,<sup>a</sup> Aurélien Chang,<sup>a</sup> Christine Hénaff,<sup>a</sup> Carole Daignebonne,<sup>a\*</sup> Aimin Yao,<sup>a</sup> Régis Gautier,<sup>a</sup> Guillaume Calvez,<sup>a</sup> Yan Suffren,<sup>a</sup> Kevin Bernot,<sup>a</sup> and Olivier Guillou<sup>a,b\*</sup>.

<sup>a</sup> Univ Rennes, INSA Rennes, ENSCR, CNRS UMR 6226 "Institut des Sciences Chimiques de Rennes", 35708 Rennes, France.

<sup>b</sup> Institut Universitaire de France, 1 rue Descartes, 75005 Paris, France

\* To whom correspondence should be addressed.

Olivier.guillou@insa-rennes.fr

Carole.Daignebonne@insa-rennes.fr

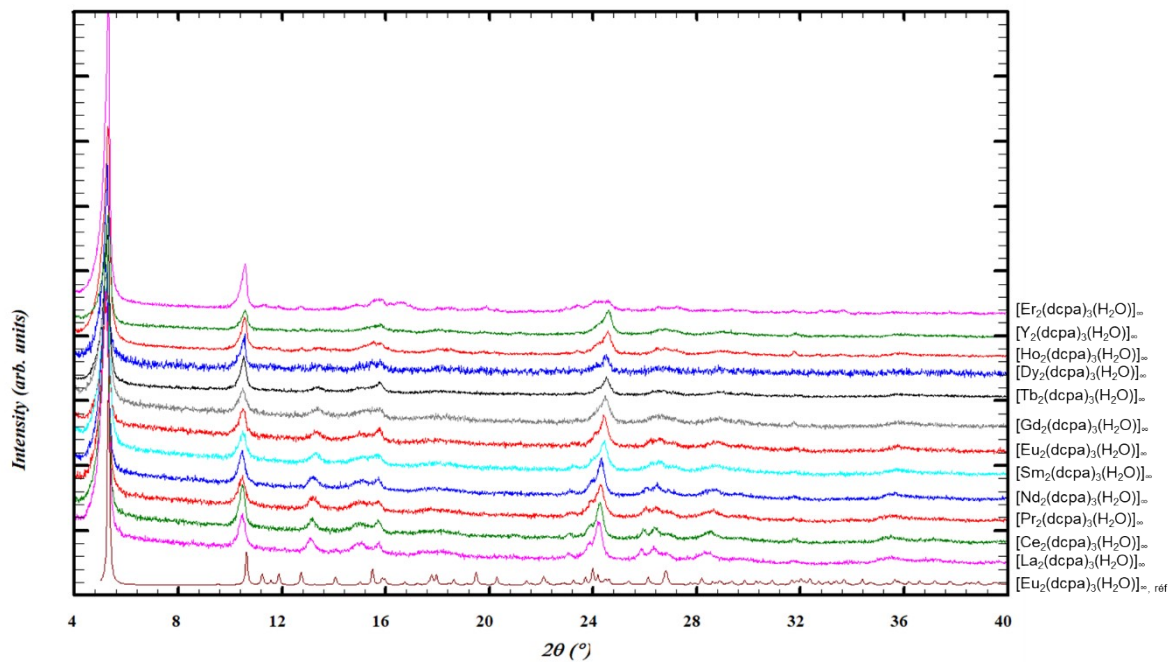

**Figure S1.** Experimental X-ray powder diffraction diagrams of  $[\text{Ln}_2(\text{dcpa})_3(\text{H}_2\text{O})]_\infty$  with  $\text{Ln} = \text{La-Er}$  except Pm plus Y and simulated powder diffraction pattern of  $[\text{Eu}_2(\text{dcpa})_3(\text{H}_2\text{O})]_\infty$  from its crystal structure (CCDC-1551529).

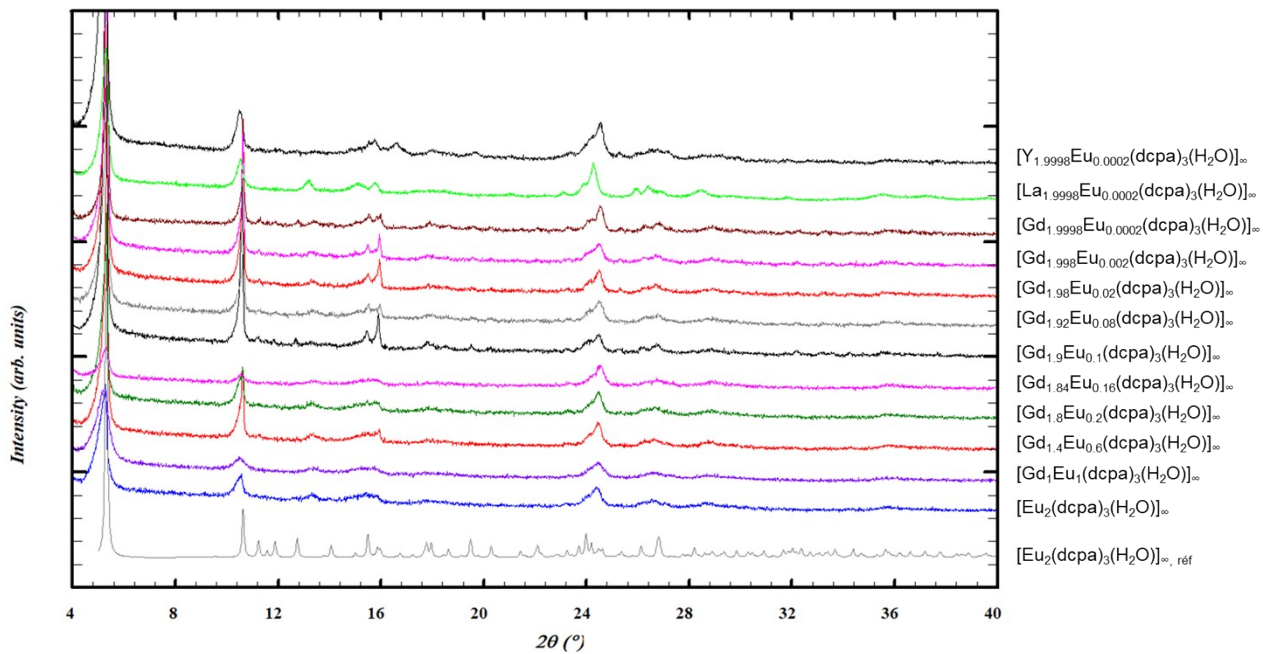

**Figure S2.** Experimental X-ray powder diffraction diagrams of  $[\text{Gd}_{2-2x}\text{Eu}_{2x}(\text{dcpa})_3(\text{H}_2\text{O})]_\infty$  with  $0.0001 \leq x \leq 1$ ,  $[\text{La}_{2-2x}\text{Eu}_{2x}(\text{dcpa})_3(\text{H}_2\text{O})]_\infty$  and  $[\text{Y}_{2-2x}\text{Eu}_{2x}(\text{dcpa})_3(\text{H}_2\text{O})]_\infty$  with  $x = 0.0001$  and simulated powder diffraction pattern of  $[\text{Eu}_2(\text{dcpa})_3(\text{H}_2\text{O})]_\infty$  from its crystal structure (CCDC-1551529).

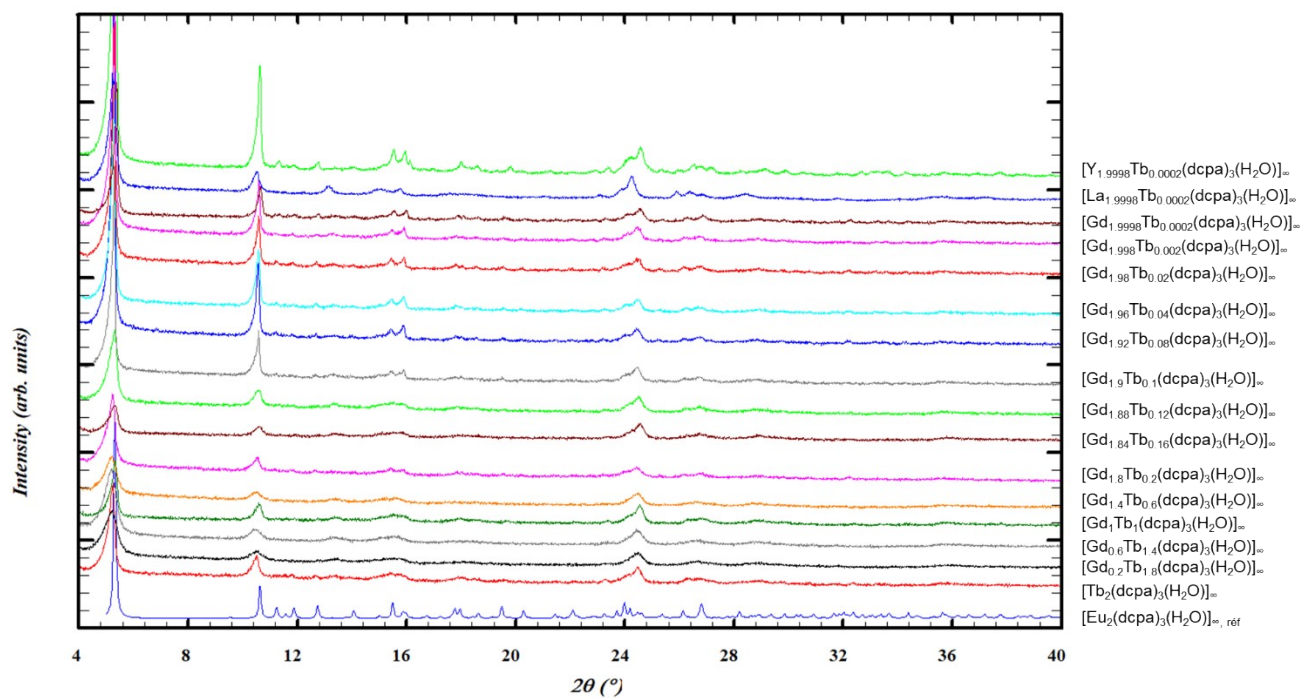

**Figure S3.** Experimental X-ray powder diffraction diagrams of  $[Gd_{2-2x}Tb_{2x}(dcpa)_3(H_2O)]_{\infty}$  with  $0.0001 \leq x \leq 1$ ,  $[La_{2-2x}Tb_{2x}(dcpa)_3(H_2O)]_{\infty}$  and  $[Y_{2-2x}Tb_{2x}(dcpa)_3(H_2O)]_{\infty}$  with  $x = 0.0001$  and simulated powder diffraction pattern of  $[Eu_2(dcpa)_3(H_2O)]_{\infty}$  from its crystal structure (CCDC-1551529).

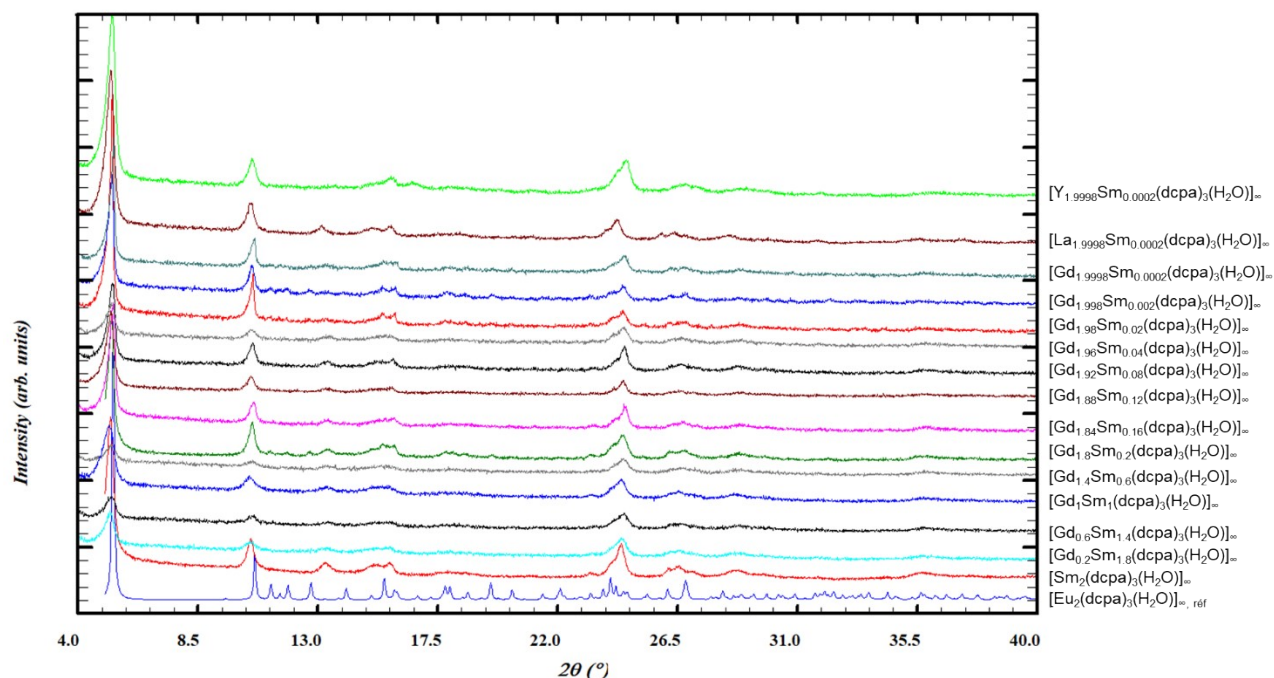

**Figure S4.** Experimental X-ray powder diffraction diagrams of  $[Gd_{2-2x}Sm_{2x}(dcpa)_3(H_2O)]_{\infty}$  with  $0.0001 \leq x \leq 1$ ,  $[La_{2-2x}Sm_{2x}(dcpa)_3(H_2O)]_{\infty}$  and  $[Y_{2-2x}Sm_{2x}(dcpa)_3(H_2O)]_{\infty}$  with  $x = 0.0001$  and simulated powder diffraction pattern of  $[Eu_2(dcpa)_3(H_2O)]_{\infty}$  from its crystal structure (CCDC-1551529).





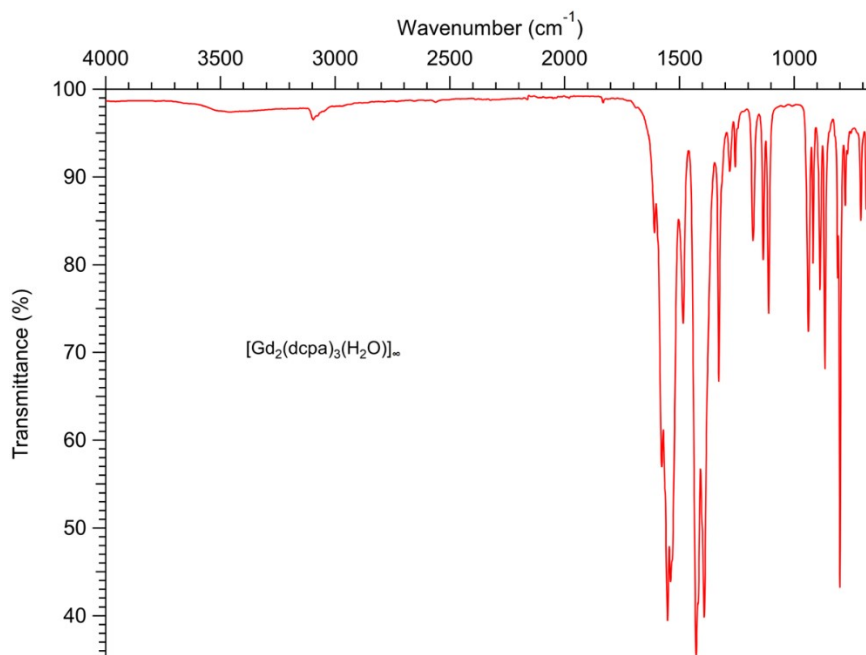

**Figure S7.** Solid state IR spectrum of  $[\text{Gd}_2(\text{dcpa})_3(\text{H}_2\text{O})]_\infty$ .

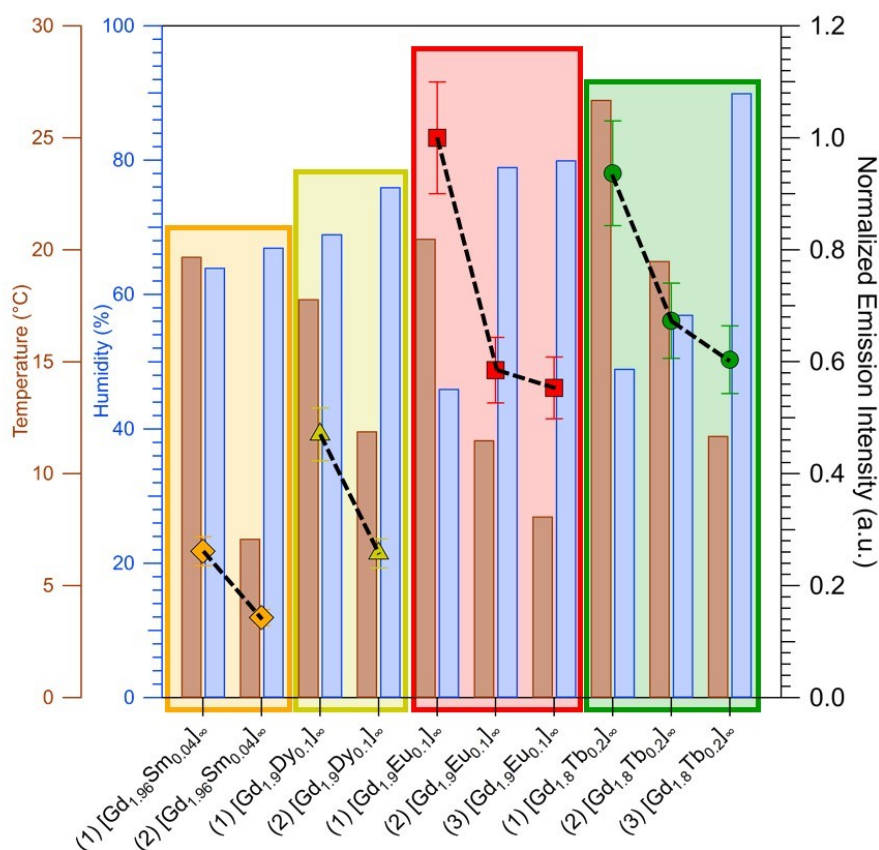

**Figure S8.** Luminescence intensities of  $[\text{Gd}_{1.96}\text{Sm}_{0.04}(\text{dcpa})_3(\text{H}_2\text{O})]_\infty$ ,  $[\text{Gd}_{1.9}\text{Dy}_{0.1}(\text{dcpa})_3(\text{H}_2\text{O})]_\infty$ ,  $[\text{Gd}_{1.8}\text{Eu}_{0.2}(\text{dcpa})_3(\text{H}_2\text{O})]_\infty$  and  $[\text{Gd}_{1.8}\text{Tb}_{0.2}(\text{dcpa})_3(\text{H}_2\text{O})]_\infty$ , versus climatic conditions during the preparation of the microcrystalline powders. The numbers (1), (2) and (3) refer to different samples.

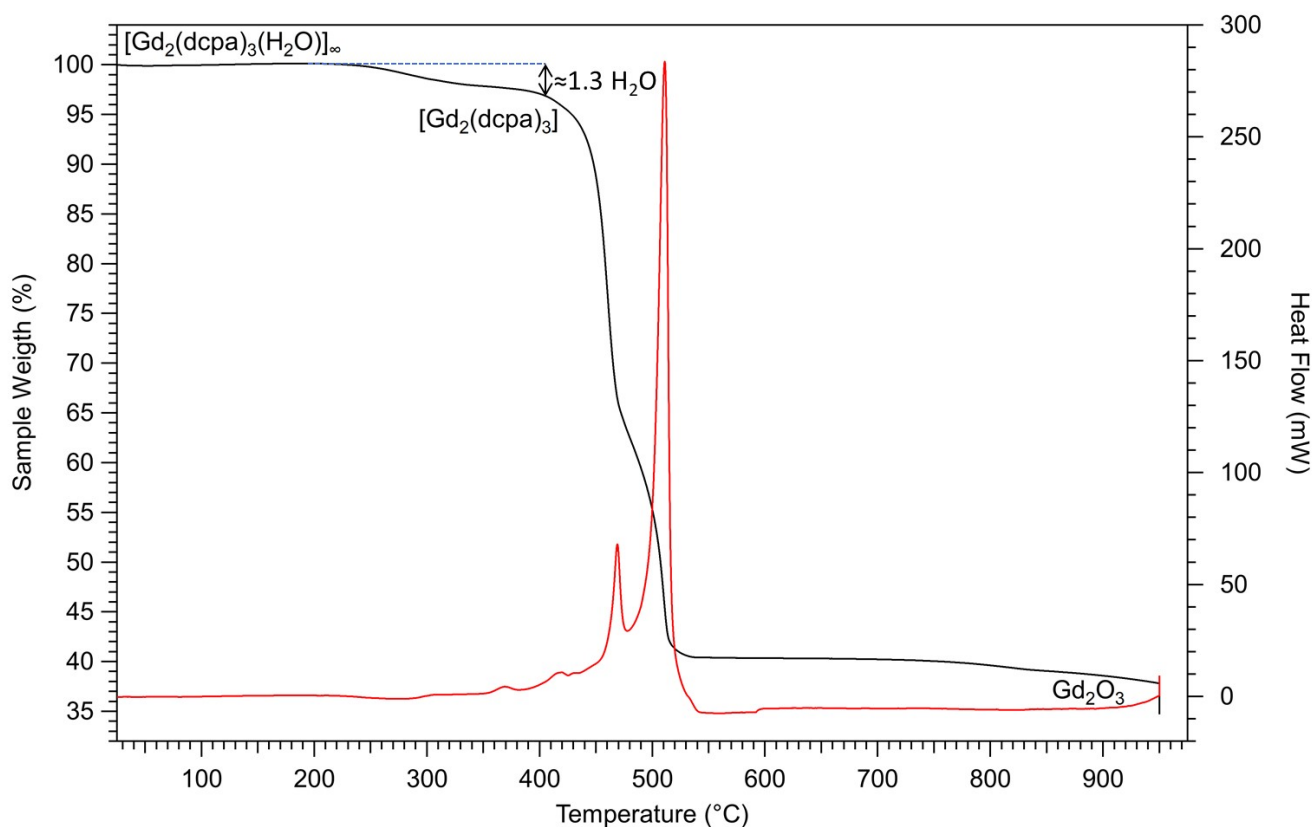

**Figure S9.** Thermal analysis of  $[\text{Gd}_2(\text{dcpa})_3(\text{H}_2\text{O})]_\infty$  under air flux in a platinum crucible.

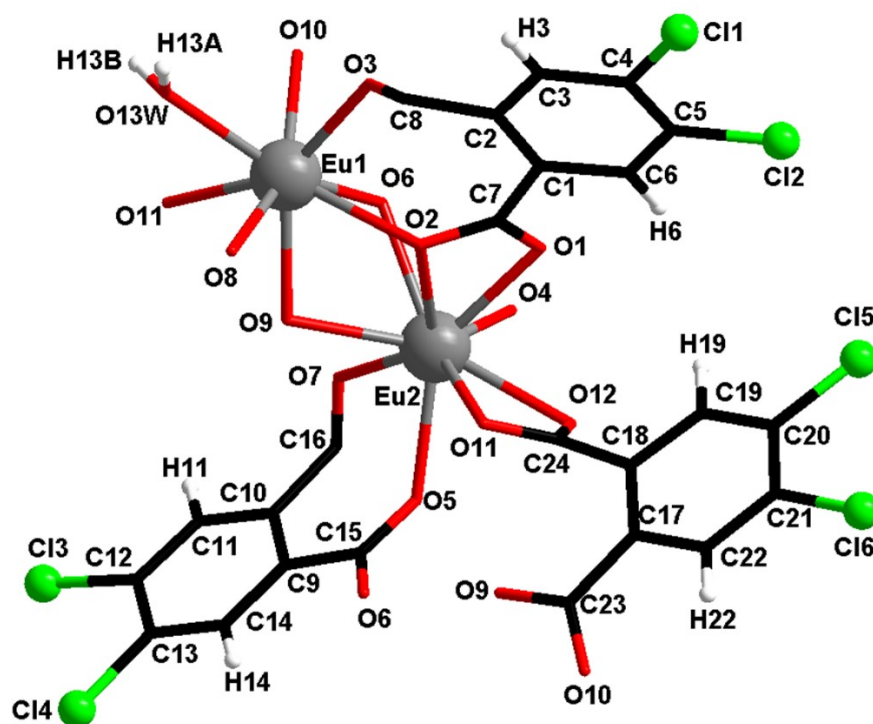

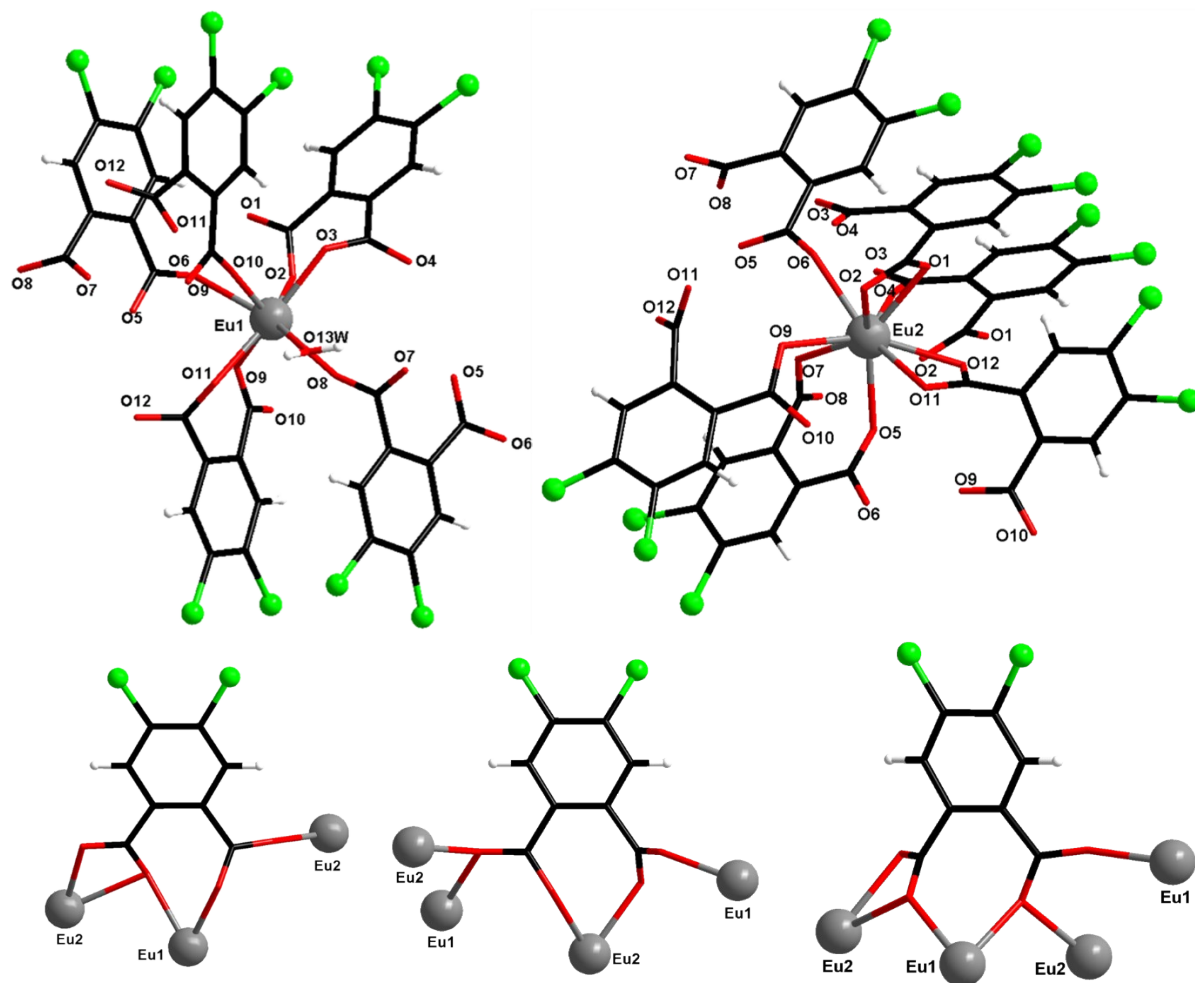

**Figure S11.** Lanthanide ions environments (top) and coordination modes of the  $\text{dcpa}^{2-}$  ligands (bottom) in  $[\text{Eu}_2(\text{dcpa})_3(\text{H}_2\text{O})]_\infty$ .

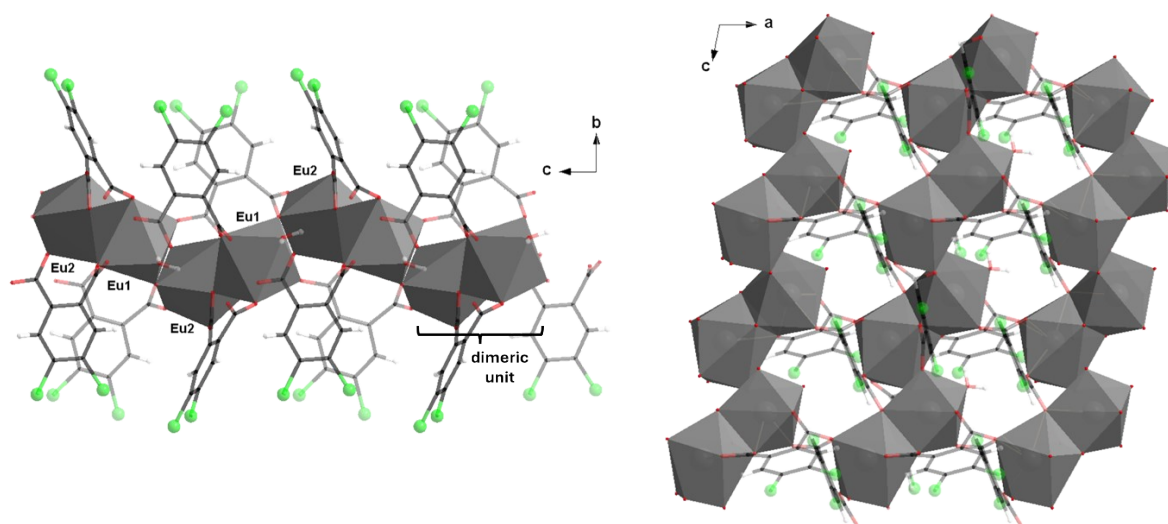

**Figure S12.** Projection views along the  $a$ - and  $b$ -axis of a chain-like molecular motif (left) and of a bidimensional molecular motif (right) of  $[\text{Eu}_2(\text{dcpa})_3(\text{H}_2\text{O})]_\infty$ .

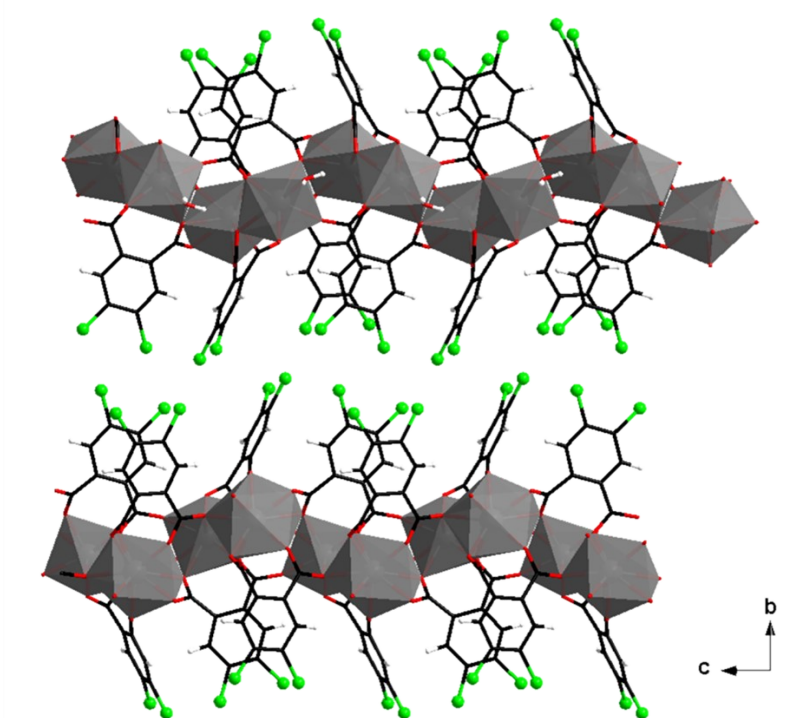

**Figure S13.** Projection view along the  $a$ -axis of two adjacent molecular planes of  $[\text{Eu}_2(\text{dcpa})_3(\text{H}_2\text{O})]_\infty$ .

**Table S1.** Mean distance between emissive lanthanide ions *versus* the doping rate in molecular alloys of general chemical formula  $[\text{Ln}_{2x}\text{Ln}'_{2-2x}(\text{dcpa})_3(\text{H}_2\text{O})]_\infty$ .

| Doping rate of emissive ions (%) | Mean distance between emissive lanthanide ions (Å) |
|----------------------------------|----------------------------------------------------|
| 0.01                             | 95.2                                               |
| 0.1                              | 44.2                                               |
| 0.5                              | 25.5                                               |
| 1                                | 20.5                                               |
| 2                                | 17.3                                               |
| 4                                | 13.6                                               |
| 5                                | 11.4                                               |
| 6                                | 10.5                                               |
| 8                                | 9.5                                                |
| 10                               | 8.9                                                |
| 20                               | 6.0                                                |
| 30                               | 5.5                                                |
| 40                               | 4.8                                                |
| 50                               | 4.2                                                |
| 60                               | 4.1                                                |
| 70                               | 4.0                                                |
| 80                               | 3.9                                                |
| 90                               | 3.9                                                |
| 100                              | 3.8                                                |



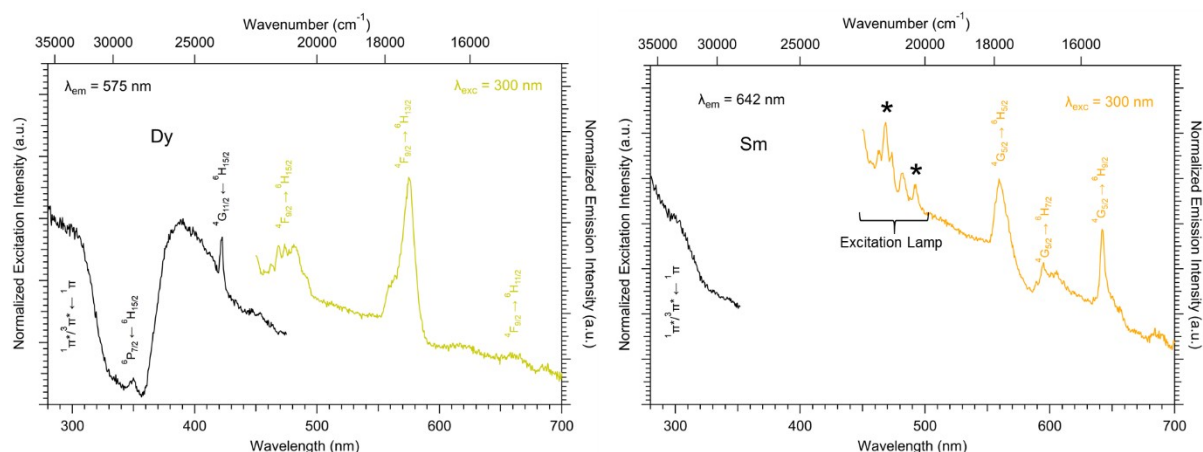

**Figure S14.** Room temperature solid-state excitation and emission spectra of  $[\text{Ln}_2(\text{dcpa})_3(\text{H}_2\text{O})]_\infty$  with  $\text{Ln} = \text{Dy}$  (left) and  $\text{Sm}$  (right). Stars indicate emission peaks due to the excitation lamp.

**Table S2.** O-O distances in  $[\text{Eu}_2(\text{dcpa})_3(\text{H}_2\text{O})]_\infty$ .

| Atom1 | Atom2 | Symmetry          | Distance (Å) |
|-------|-------|-------------------|--------------|
| O13W  | O11   | x, y, z           | 2.8396(34)   |
|       | O8    | 1+x, 1/2-y, 1/2+z | 2.8759(33)   |
|       | O7    | 1+x, 1/2-y, 1/2+z | 2.9153(29)   |
|       | O5    | 1+x, y, z         | 2.9767(35)   |
|       | O2    | x, 1/2-y, -1/2+z  | 2.9904(30)   |
|       | O10   | x, 1/2-y, -1/2+z  | 3.0104(33)   |
|       | O8    | 1+x, y, z         | 3.0885(33)   |
|       | O3    | x, y, z           | 3.2396(35)   |

**Table S3.** Cl-Cl distances in  $[\text{Eu}_2(\text{dcpa})_3(\text{H}_2\text{O})]_\infty$ .

| Atom1 | Atom2 | Symmetry           | Distance (Å) |
|-------|-------|--------------------|--------------|
| Cl1   | Cl2   | x, y, z            | 3.1765(15)   |
|       | Cl1   | x, y, z            | 3.1765(15)   |
|       | Cl6   | 2-x, -1/2+y, 3/2-z | 3.3464(14)   |
|       | Cl4   | 1-x, -y, 1-z       | 3.4222(15)   |
| Cl3   | Cl4   | x, y, z            | 3.1867(13)   |
|       | Cl3   | x, y, z            | 3.1866(13)   |
|       | Cl5   | 1-x, -1/2+y, 1/2-z | 3.3280(14)   |
|       | Cl2   | 1-x, -y, 1-z       | 3.4218(15)   |
| Cl5   | Cl6   | x, y, z            | 3.1644(12)   |
|       | Cl4   | 1-x, 1/2+y, 1/2-z  | 3.3294(14)   |
| Cl6   | Cl5   | x, y, z            | 3.1651(12)   |
|       | Cl2   | 2-x, 1/2+y, 3/2-z  | 3.3461(14)   |
